# Supplementary material for: Comparative Analysis of Far East Sikhotinsky Rhododendron (Rh. sichotense) and East Siberian Rhododendron (Rh. adamsii) Using Supercritical CO2-Extraction and HPLC-ESI-MS/MS Spectrometry
Source: PubMed Central journal article supplement (PMC7503641; doi:10.3390/molecules25173774), 2020-08-19
Supplement: molecules-25-03774-s001.pdf [file molecules-25-03774-s001.pdf]

# Supplementary

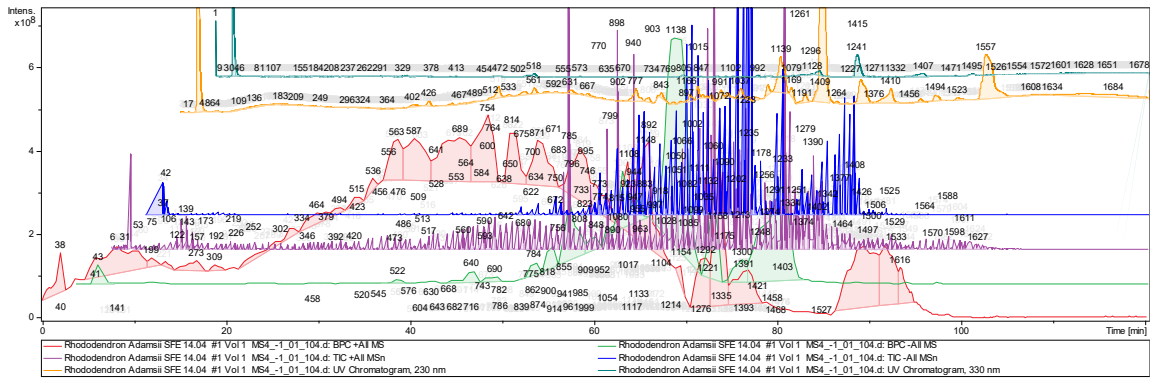

**Figure S1.** Chemical profiles of the *Rh. adamsii* sample represented ion chromatogram from SC-CO<sub>2</sub> extract (Red line – positive ion signal intensity graph; green line – negative ion signal intensity graph; violet line – total positive ion intensity, blue line – total negative ion intensity).

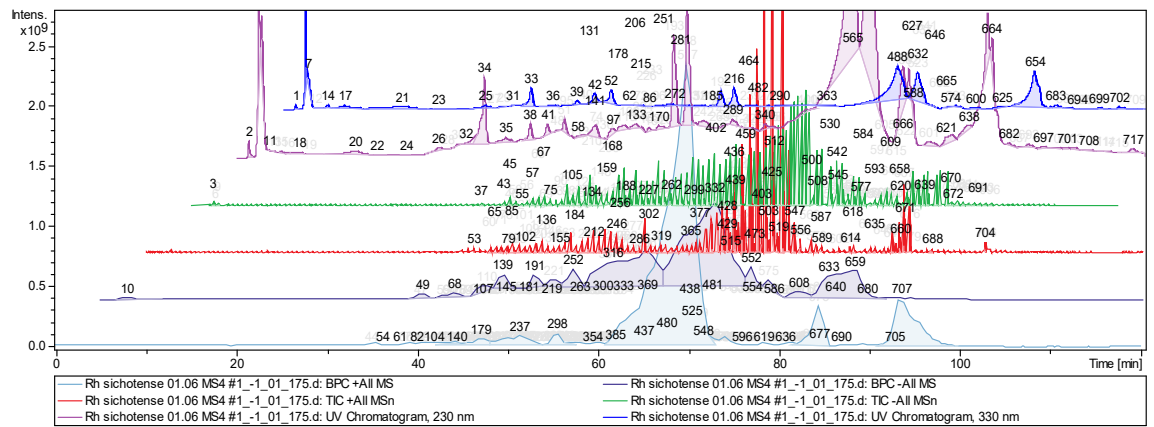

**Figure S2.** Chemical profiles of the *Rh. sichotense* sample represented ion chromatogram from SC-CO<sub>2</sub> extract (Blue line – positive ion signal intensity graph; violet line – negative ion signal intensity graph; red line – total positive ion intensity, green line – total negative ion intensity).
